# Supplementary material for: Assessing public support for extending smoke-free policies beyond enclosed public places and workplaces: protocol for a systematic review and meta-analysis
Source: PubMed Central journal article supplement (PMC7925902; doi:10.1136/bmjopen-2020-040167), 2021-02-05
Supplement: bmjopen-2020-040167supp001.pdf [file bmjopen-2020-040167supp001.pdf]

**Appendix I****embase.com (1974-)**

('smoking regulation'/exp OR (smokefree OR ((smoking OR smoke OR tobacco) NEAR/3 (regulation\* OR government\* OR law OR laws OR policy OR policies OR ban OR bans OR banned OR free OR restrict\* OR act OR acts))):ab,ti) AND ('public opinion'/exp OR 'public attitude'/de OR (opinion\* OR support\* OR views OR (public NEAR/3 view) OR attitude\* OR feeling\* OR acceptance\* OR accepts OR perception\* OR misperception\*):ab,ti) NOT ( [Letter]/lim OR [Note]/lim OR [Editorial]/lim)

**Medline Ovid (1946-)**

(Smoke-Free Policy/ OR (smokefree OR ((smoking OR smoke OR tobacco) ADJ3 (regulation\* OR government\* OR law OR laws OR policy OR policies OR ban OR bans OR banned OR free OR restrict\* OR act OR acts))).ab,ti.) AND (Public Opinion/ OR Attitude/ OR (opinion\* OR support\* OR views OR (public ADJ3 view) OR attitude\* OR feeling\* OR acceptance\* OR accepts OR perception\* OR misperception\*).ab,ti.) NOT (news OR book\* OR chapter\* OR dissertation abstract\*).pt.

**Web of science Core Collection (1975-)**

TS=(((smokefree OR ((smoking OR smoke OR tobacco) NEAR/2 (regulation\* OR government\* OR law OR laws OR policy OR policies OR ban OR bans OR banned OR free OR restrict\* OR act OR acts)))) AND ((opinion\* OR support\* OR views OR (public NEAR/2 view) OR attitude\* OR feeling\* OR acceptance\* OR accepts OR perception\* OR misperception\*)) )

**PsycINFO Ovid (1806-)**

((smokefree OR ((smoking OR smoke OR tobacco) ADJ3 (regulation\* OR government\* OR law OR laws OR policy OR policies OR ban OR bans OR banned OR free OR restrict\* OR act OR acts))).ab,ti.) AND (Public Opinion/ OR Attitudes/ OR (opinion\* OR support\* OR views OR (public ADJ3 view) OR attitude\* OR feeling\* OR acceptance\* OR accepts OR perception\* OR misperception\*).ab,ti.) NOT (news OR book\* OR chapter\* OR dissertation abstract\*).pt.

**LILACS**

(smokefree OR smoking OR smoke) AND (opinions OR views OR attitudes)

**Scientific Electronic Library Online [SciELO]**

(smokefree OR smoking OR smoke) AND (opinions OR views OR attitudes)

**WHO Global Health Library**

(smokefree OR smoking OR smoke) AND (opinions OR views OR attitudes)
